# Supplementary material for: Investigating midwives and nurses reporting of ‘infant feeding at hospital discharge’: an online survey across NSW Australia
Source: Springer Nature journal article supplement (doi:10.1186/s13006-024-00637-w), 2024-04-23
Supplement: MOESM1 [file 27008256]

# Questionnaire

*Investigating midwives and nurses reporting of 'infant feeding at hospital discharge': an online survey across NSW Australia*

## **Section A** **Demographics**

The following questions are about you and what you do. There are no right or wrong answers.

**What Local Health District do you currently practice in?**

Sydney  
South-Western Sydney  
South-Eastern Sydney  
Illawarra Shoalhaven  
Western Sydney  
Nepean Blue Mountains  
Northern Sydney  
Central Coast  
Hunter New England  
Northern NSW  
Mid North Coast  
Southern NSW  
Murrumbidgee  
Western NSW  
Far West  
Other

**What hospital within this district do you work?**

### **Public**

Armidale  
Auburn  
Bankstown-Lidcombe  
Bathurst Base  
Bega Base  
Blacktown  
Blue Mountains  
Bowral  
Broken Hill Base  
Campbelltown  
Canterbury  
Coffs Harbour  
Dubbo Base  
Fairfield  
Gosford  
Grafton Base  
Griffith Base  
Hawkesbury  
Hornsby  
Inverell  
John Hunter  
Kempsey

Lismore Base  
Liverpool  
Maitland  
Manning Base  
Moruya  
Mudgee  
Nepean  
Northern Beaches  
Orange Base  
Port Macquarie Base  
Queanbeyan  
Royal Hospital for Women  
Royal North Shore  
Royal Prince Alfred  
Shoalhaven  
St. George  
Sutherland  
Tamworth Base  
Tweed Heads  
Westmead  
Wollongong  
Other public hospital

**Private**

Calvary  
Hurstville Community  
Karena Private  
Mater,  
Nepean Private  
Newcastle Private  
North Gosford Private  
North Shore Private  
North Sydney  
Norwest Private  
Prince of Wales Private  
St. George Private  
Sydney Adventist  
Sydney Southwest Private  
Wagga Wagga  
Westmead Private  
Wollongong Private  
Other private hospital:

**How old are you?**

<30 yrs.  
30 – 40 yrs.  
41-50 yrs.  
>50 yrs.

**What is your highest clinical qualification?**

Certificate  
Diploma  
Bachelor  
Post Grad  
Current student midwife/nurse  
Other

**How many years have you been registered as a midwife/nurse?**

Free text

**What country were you first registered in?**

United Kingdom  
New Zealand  
Philippines  
India  
Other Free text

**What is your main area of work?**

Continuity of care model  
Rotational midwife  
Birth unit  
Antenatal Clinic  
Postnatal ward  
Midwifery in the home  
NICU/SCN/ NCN  
Student midwife/nurse  
Other

**What is your current clinical role?**

Student nurse/midwife  
Midwife  
Nurse  
Midwife educator  
Nurse educator  
Clinical Midwife Consultant  
Clinical Nurse Consultant  
Manager  
Other

**How many years have you practiced in this role?**

< 5yrs  
≥ 5yrs  
≥ 10yrs

**Contracted hours at your facility?**

Part-time  
Full-time  
Casual  
Other

## **Section B** **Breastfeeding**

**This section is about your experience and education related to breastfeeding.**

**Do you have a role that provides breastfeeding support?**

Yes

No

**How many years have you been in this role?**

< 5yrs

≥ 5yrs

≥ 10yrs

**Approximately how many hours per week do you provide breastfeeding support?**

<10hrs

≥10hrs

>10hrs

**What breastfeeding education have you attended over the past 3 years?**

Australian Breastfeeding Association Courses  
Advanced breastfeeding and lactation-Griffith University-online  
Australian college of midwives 'Supporting Women to Breastfeed'  
Caper's bookstores' events  
Gold lactation online conferences  
Health-e-learning lactation courses  
Healthy Children's Centre for Breastfeeding –online modules  
iLactation online conferences  
LCANZ-webinars  
Master of midwifery (specialisation) Lactation Consultancy-Murdoch  
Medscape  
Praeclarus Press  
The Royal College of Midwives –free midwifery/lactation education  
WSLHD Breastfeeding workshop  
Other  
None

**How many hours of breastfeeding education have you attended in the past year?**

< 8hrs

≥ 8hrs

Other

None

**Do you have IBCLC certification?**

Yes- currently certified

Previously but not re-certified

Working towards

No

## **Section C**

### **Discharge information**

**This section relates to the maternity notification system that you use to discharge mothers and babies. We are interested in how you use this system and what the definitions offered in this system mean to you.**

**Maternity notification system used at your workplace?**

Cerner  
e Maternity  
Other free text:

**How many maternal/infant discharges do you complete in an average week?**

<10  
≥10  
>10

**What time frame influences how you *report* ‘infant feeding at discharge’ when entering data into your electronic maternity database?**

Most recent single-feeding episode  
Most recent two or three feeding episodes  
Feeding over the previous 12 hours  
Feeding over the previous 24hrs  
All feeding since birth  
Other- free text

**As a clinician what does ‘full breastfeeding’ at discharge mean to you?**

Only breastfeeding and/or breast milk feeding on the day of discharge  
Only breastfeeding and/or breast milk feeding over the last 12 hours  
Only breastfeeding and/or breast milk feeding over the previous 24hrs  
Only breastfeeding and/or breast milk feeding since birth  
Other – free text

**How well do you generally agree with the following statement:  
‘I often complete hospital maternity discharges without having had clinical contact with the woman or infant’**

Agree, most of the time  
Agree, some of the time  
Neither agree nor disagree  
Disagree, some of the time  
Disagree, most of the time

**If you have had no clinical contact with the mother and infant, where do you find 'feeding at discharge' information to discharge the mother and infant in your electronic data base?**

e MR  
e Maternity  
Cerner  
Mother  
Staff  
Postnatal charts  
Other

**How well do you generally agree with the following statement:  
I feel confident the information that I enter for 'feeding at discharge' is accurate.**

Agree, most of the time  
Agree, some of the time  
Neither agree nor disagree  
Disagree, some of the time  
Disagree, most of the time



## **Section D**

### **Recommendations**

The following question relates to your thoughts and recommendations as a clinician of a relevant definition of 'feeding at discharge'. Please keep in mind that some babies may be discharged days, weeks, or months after birth.

What **timeframe** do you think is most relevant to define 'feeding at discharge'?

Most recent single feeding episode  
Most recent two or three feeding episodes  
Feeding over the previous 12 hours  
Feeding over the previous 24hrs  
Feeding since birth

The following question relates to your thoughts and recommendations on the importance of understanding rates between hospitals of "exclusive breastfeeding" for women and babies in NSW. This is relevant for Baby Friendly Hospital Accreditation.

'Exclusive breastfeeding means that an infant receives only their mother's milk and necessary medications from birth'

How much do you agree that a separate question on exclusive breastfeeding at discharge would assist patient care?

Strongly disagree  
disagree  
neither agree/disagree  
strongly agree  
agree

Do have any further comments or suggestions on 'feeding at discharge'?

Free text
